# Supplementary material
Source: MDPI journal article supplement (https://www.mdpi.com/1999-4907/9/6/288)
Supplement: s1 [file s1]

SUPPLEMENTARY Figure S1

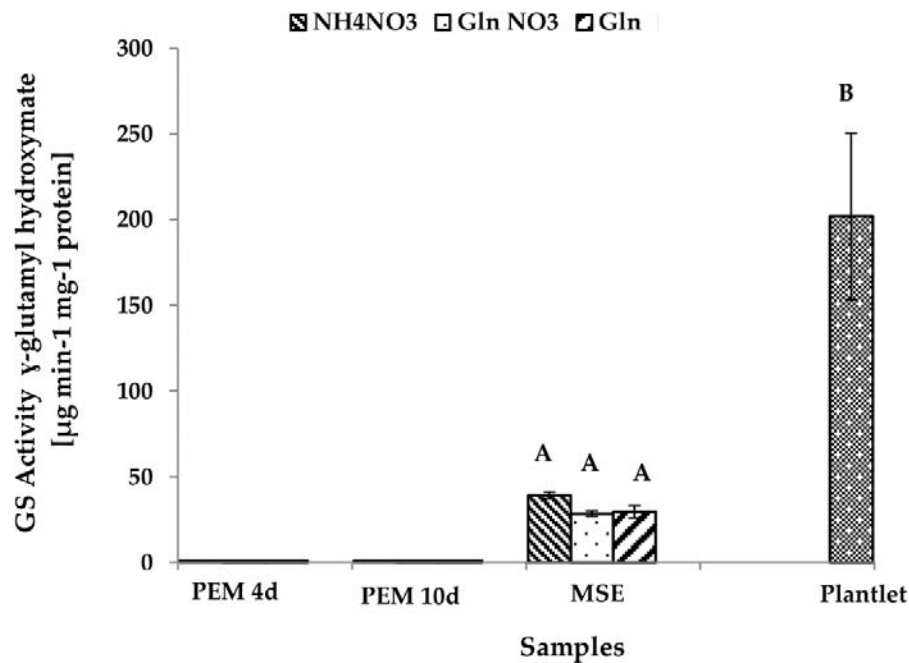

Figure S1. GS activity of 11:07:01 PEMs after 4 d and 10 d on standard or experimental media and of mature somatic embryos (MSE) generated on  $\text{NH}_4 + \text{NO}_3$  medium, Gln +  $\text{NO}_3$  medium and Gln medium in comparison with two-month old somatic embryo-derived plantlets. The plantlets are from cell line 11:12:02, and are used as a controls for the analysis. Bars indicate standard errors. Different letters over the columns indicate significant differences by the Tukey-Kramer HSD test,  $p \leq 0.05$ .
